# Supplementary material for: Autophagic Upregulation Is Cytoprotective in Ischemia/Reperfusion-Injured Retina and Retinal Progenitor Cells
Source: MDPI journal article supplement (doi:10.3390/ijms22168446), 2021-08-06

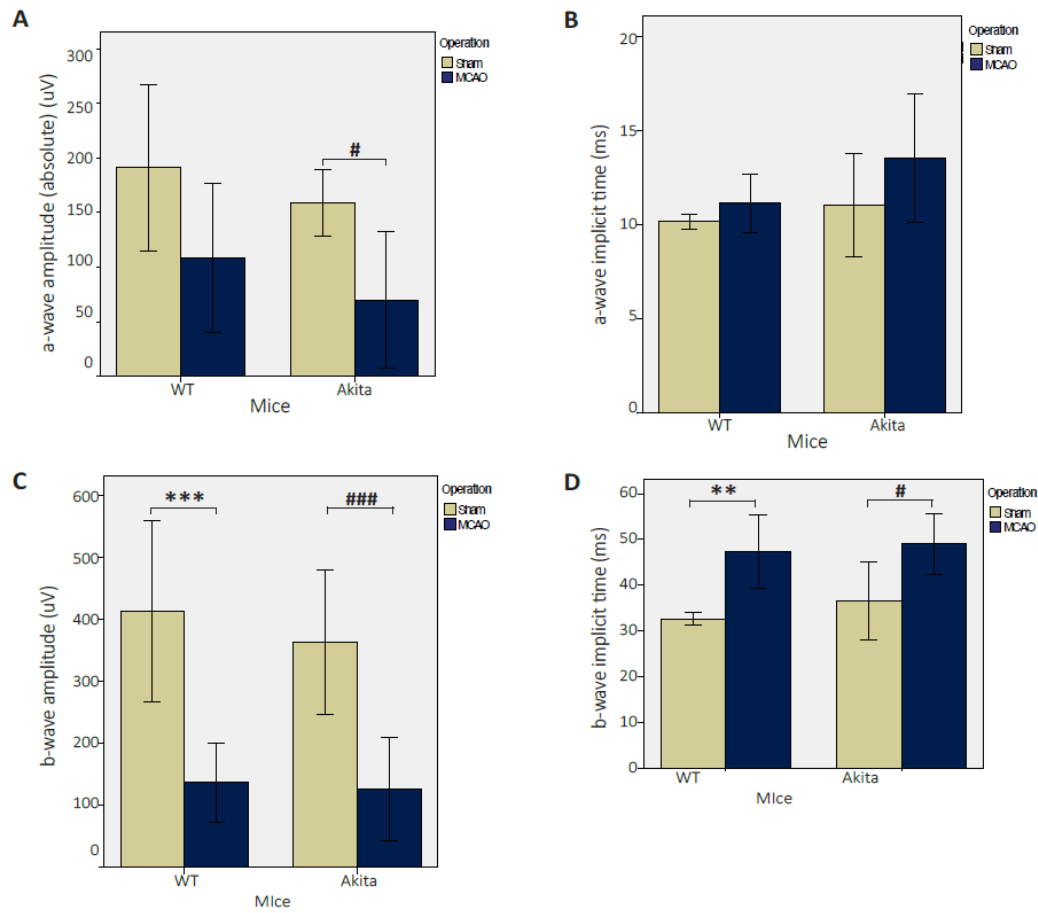

**Supplementary Figure S1.** Scotopic flash ERG responses of a- and b-waves in WT and Akita mice after sham or MCAO treatment (2I2R group) at 3 cd.s/m<sup>2</sup> intensity (**A**) a-wave amplitude (**B**) a-wave implicit time (**C**) b-wave amplitude (**D**) bwave implicit time.  $n = 7$  for WT sham group,  $n = 8$  for WT MCAO group and Akita MCAO group,  $n = 9$  for Akita sham group. #  $p < 0.05$ , ###  $p < 0.001$  as compared with Akita sham. \*\*  $p < 0.01$ , \*\*\*  $p < 0.001$  as compared with WT sham. Values represent mean with error bars  $\pm$  SD. (Figure and caption has been adapted from a dissertation[9]. Please refer to acknowledgements section.)

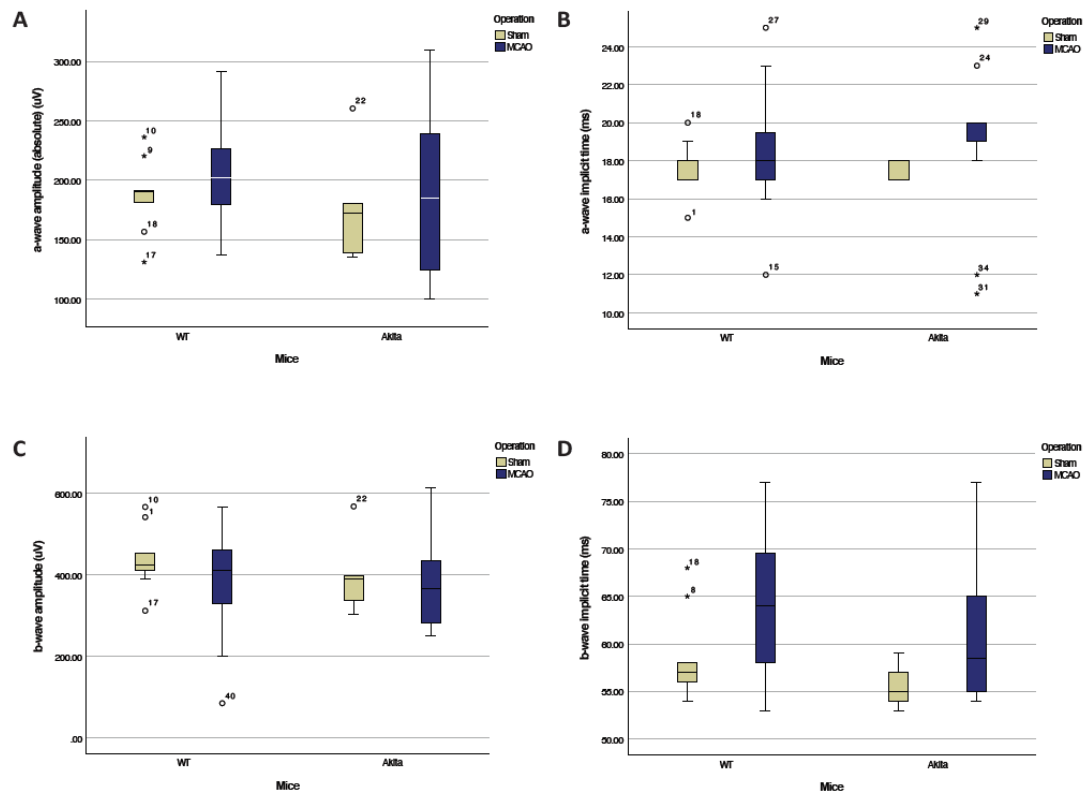

**Supplementary Figure S2.** Scotopic flash ERG responses of a- and b-waves in WT and Akita mice after sham or MCAO treatment (2I22 group) at 3 cd.s/m<sup>2</sup> intensity. **(A)** a-wave amplitude **(B)** a-wave implicit time **(C)** b-wave amplitude **(D)** b-wave implicit time.  $n = 9$  for WT sham group.  $n = 15$  for WT MCAO group.  $n = 5$  for Akita sham group.  $n = 14$  for Akita MCAO. (Figure and caption has been adapted from a dissertation[9]. Please refer to acknowledgements section.)

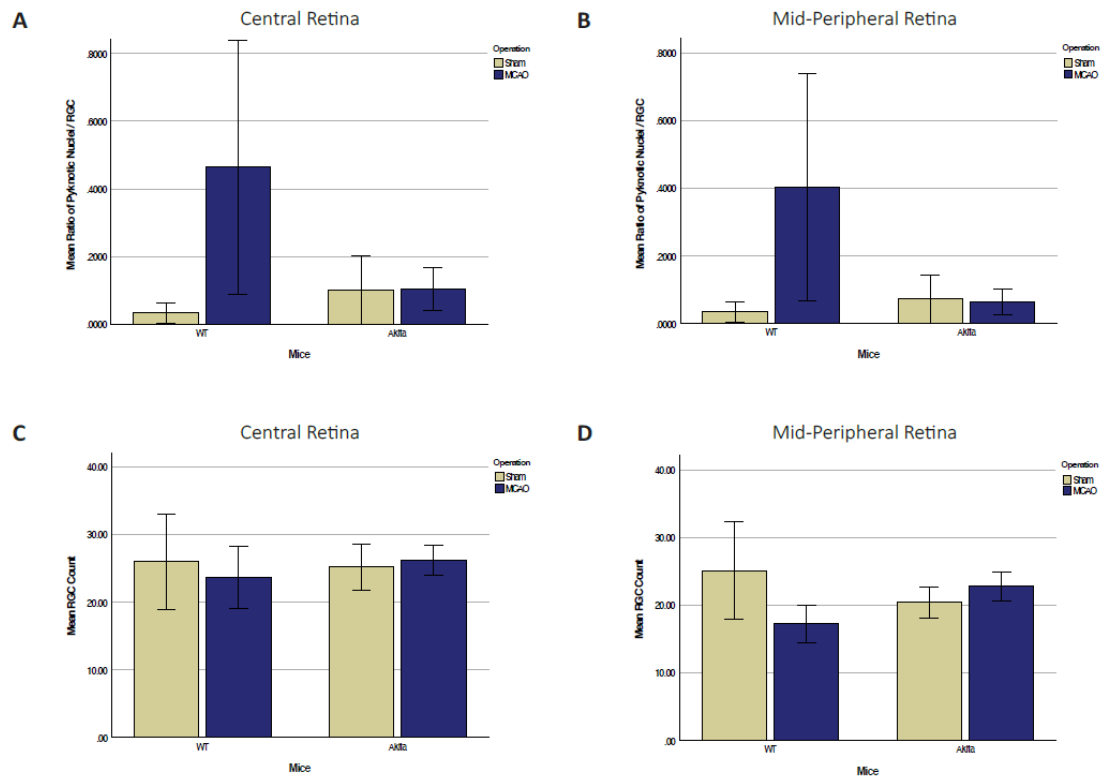

**Supplementary Figure S3.** RGC and pyknotic cell count in the GCL (2I2R group). (A, B) Ratio of cells with pyknotic nuclei to RGCs in the central (A) and mid-peripheral retina (B). (C, D) Number of RGCs in the GCL in the central (C) and midperipheral retina (D). No statistical significance detected.  $n = 5$  in each group. Values represent mean with error bars  $\pm$  SD. (Figure and caption has been adapted from a dissertation[9]. Please refer to acknowledgements section.)

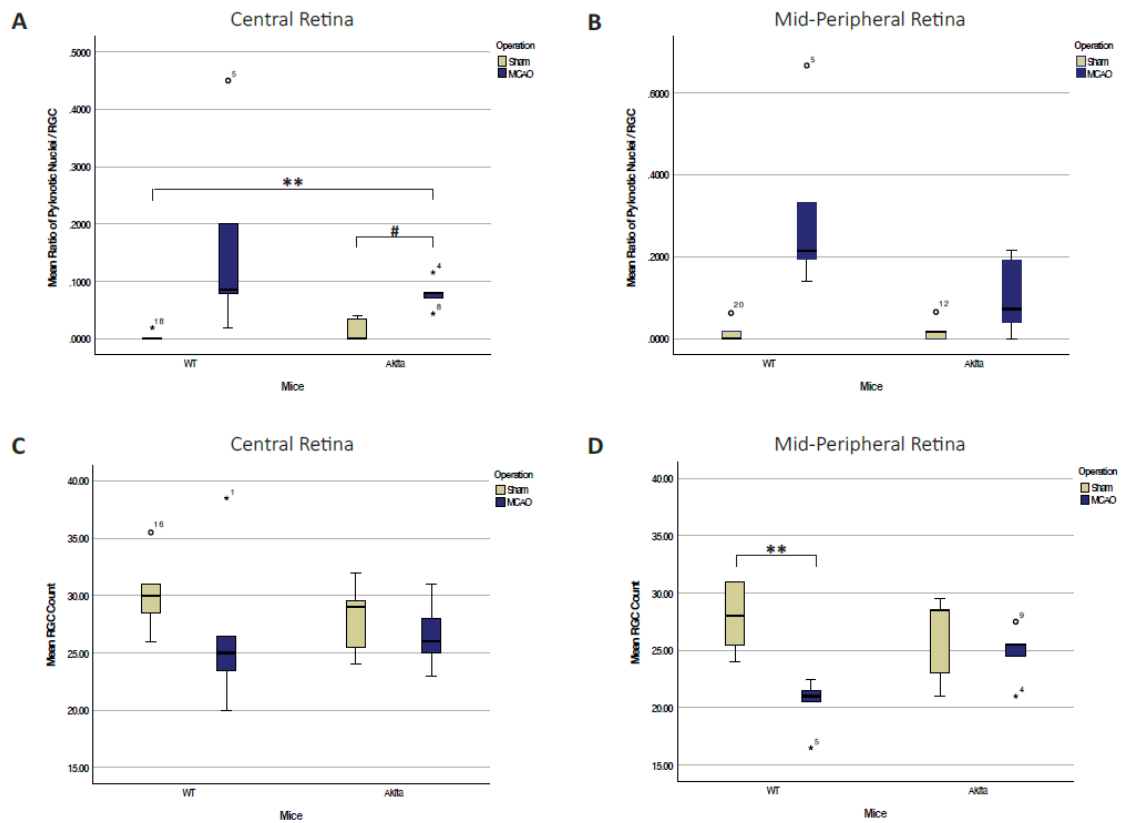

**Supplementary Figure S4.** RGC and pyknotic cell count in the GCL (2I22R group) (**A, B**) Ratio of cells with pyknotic nuclei to RGCs in the central (**A**) and mid-peripheral retina (**B**). (**C, D**) Number of RGCs in the GCL in the central (**C**) and midperipheral retina (**D**). The RGC cell count was slightly lower in WT MCAO-injured retinae as compared with WT sham-treated retinae in the mid-peripheral retinae, with statistical significance detected in the mid-peripheral retinae.  $n = 5$  in each group. \*\*  $p < 0.01$  as compared with WT sham group. #  $p < 0.05$  as compared with Akita sham group. (Figure and caption has been adapted from a dissertation[9]. Please refer to acknowledgements section.)

Supplementary Figure S5. Examples of PCR analysis for genotyping of Akita mice

| Lane   | 1      | 2     | 3     | 4     | 5       | 6      |
|--------|--------|-------|-------|-------|---------|--------|
| Marker | Marker | A8/E8 | A7/C2 | A7/C1 | A7/13-1 | A8/5-3 |
| Result | ---    | WT    | WT    | WT    | Akita   | WT     |

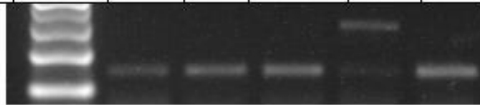

| Lane   | 1      | 2     | 3    | 4     | 5     | 6     | 7     | 8     | 9     | 10    |
|--------|--------|-------|------|-------|-------|-------|-------|-------|-------|-------|
| Marker | Marker | G1-2  | G1-3 | A8/B1 | A8/B2 | A8/B3 | A8/B4 | A8/B5 | A8/B6 | A8/B7 |
| Result | ---    | Akita | WT   | WT    | Akita | Akita | WT    | WT    | WT    | WT    |

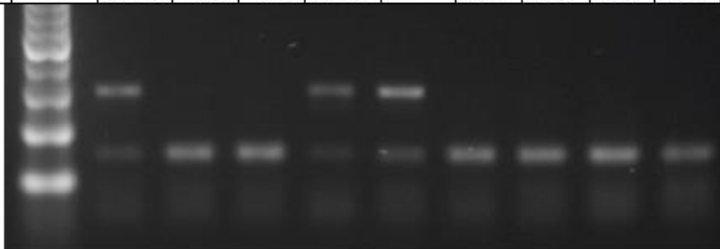

| Lane   | 1      | 2      | 3      | 4      | 5     | 6     | 7     | 8      | 9      | 10     | 11     | 12     | 13      |
|--------|--------|--------|--------|--------|-------|-------|-------|--------|--------|--------|--------|--------|---------|
| Marker | Marker | A8/5-1 | A8/5-2 | A8/5-4 | A7/D1 | A7/D2 | A7/D3 | A2/9-1 | A2/9-2 | A2/9-3 | A2/9-4 | A2/9-5 | A7/13-2 |
| Result | ---    | Akita  | Akita  | Akita  | Akita | Akita | Akita | WT     | Akita  | WT     | WT     | Akita  | Akita   |

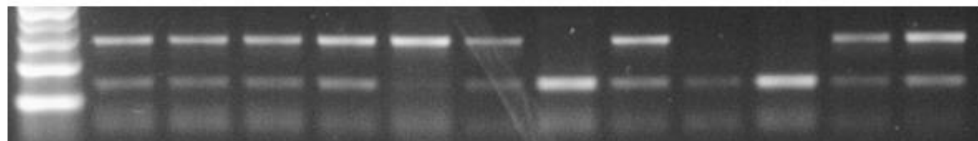

| Lane   | 1      | 2 | 3 | 4       | 5       | 6      | 7      | 8      | 9     | 10    | 11    | 12    | 13    |
|--------|--------|---|---|---------|---------|--------|--------|--------|-------|-------|-------|-------|-------|
| Marker | Marker | / | / | A7/12-8 | A7/12-9 | A8/5-5 | A8/5-6 | A8/5-7 | A7/D4 | A7/D5 | A7/D6 | A7/D7 | A7/D8 |
| Result | ---    | / | / | Akita   | Akita   | Akita  | Akita  | WT     | Akita | WT    | Akita | Akita | Akita |

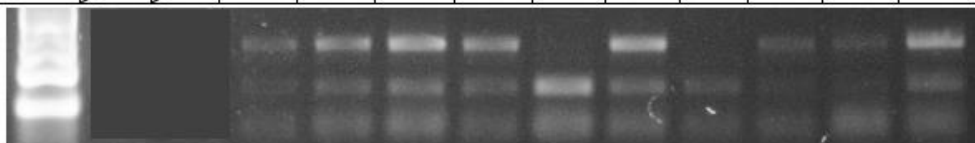

| Lane   | 1      | 2       | 3       | 4       | 5       | 6 | 7       | 8       |
|--------|--------|---------|---------|---------|---------|---|---------|---------|
|        | Marker | G1/20-1 | G1/20-1 | G1/11-1 | G1/11-2 | / | G1/11-4 | G1/11-5 |
| Result | ---    | WT      | WT      | Akita   | Akita   | / | Akita   | Akita   |

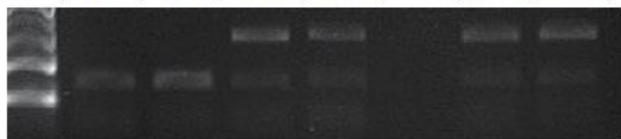

| Lane   | 1      | 2     | 3    | 4     | 5    |
|--------|--------|-------|------|-------|------|
|        | Marker | F2-6  | G1-1 | G1-2  | G1-3 |
| Result | ---    | Akita | WT   | Akita | WT   |

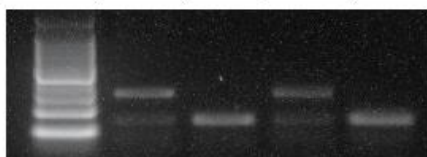

| Lane   | 1     | 2     | 3     | 4 | 5     | 6     | 7     | 8     | 9      | 10 | 11 | 12   | 13    | 14    | 15    | 16    |
|--------|-------|-------|-------|---|-------|-------|-------|-------|--------|----|----|------|-------|-------|-------|-------|
|        | F1-1  | F1-2  | F1-4  | / | F2-7  | F3-8  | F5-15 | F6-19 | Marker | /  | /  | G1-3 | G1-4  | G2-1  | G2-2  | G2-3  |
| Result | Akita | Akita | Akita | / | Akita | Akita | Akita | Akita |        | /  | /  | WT   | Akita | Akita | Akita | Akita |

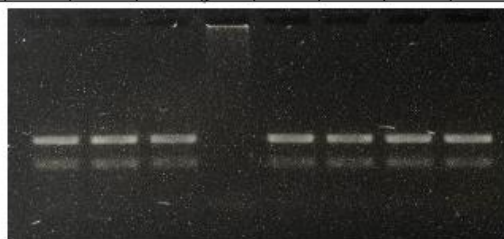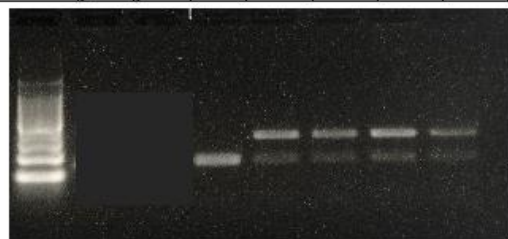

Supplement: s1 [file s1]
